# Supplementary material for: Structural Breakdown of Collagen Type I Elastin Blend Polymerization
Source: MDPI journal article supplement (doi:10.3390/polym14204434), 2022-10-20
Supplement: s1 [file s1]

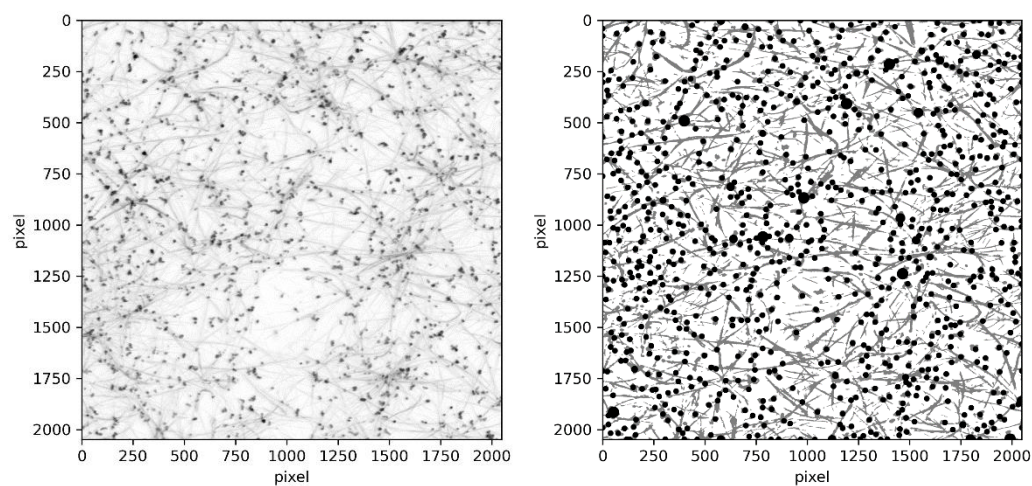

**Figure S1.** Left: 10 stacked images of a 2 mg/ml collagen type I gel. Right: Cluster detection as indicated by black dots. These were ignored for the fiber thickness estimation as shown in Figure S2.

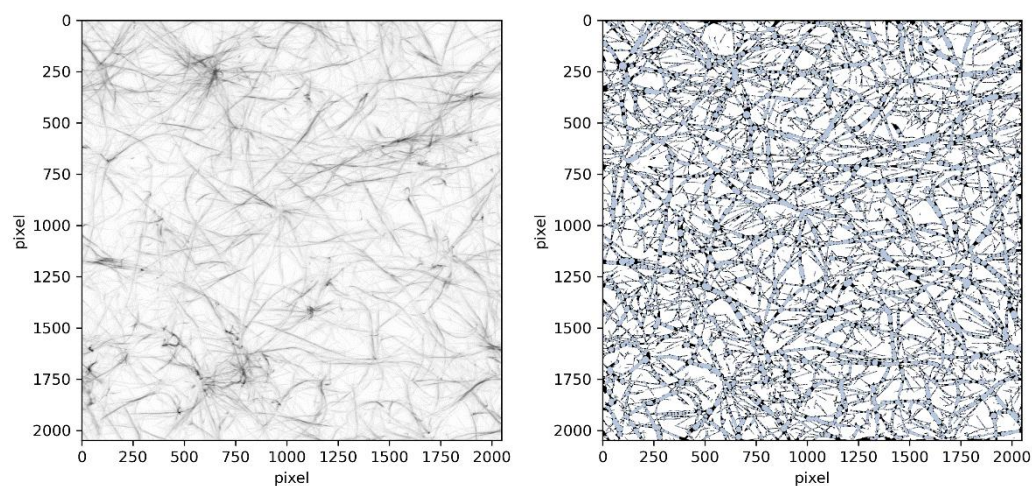

**Figure S2.** Left: Exemplary 2 mg/ml collagen gel. Right: Fiber thickness estimation. Detection was similarly done for elastin collagen after cluster removal as shown in Figure S1.

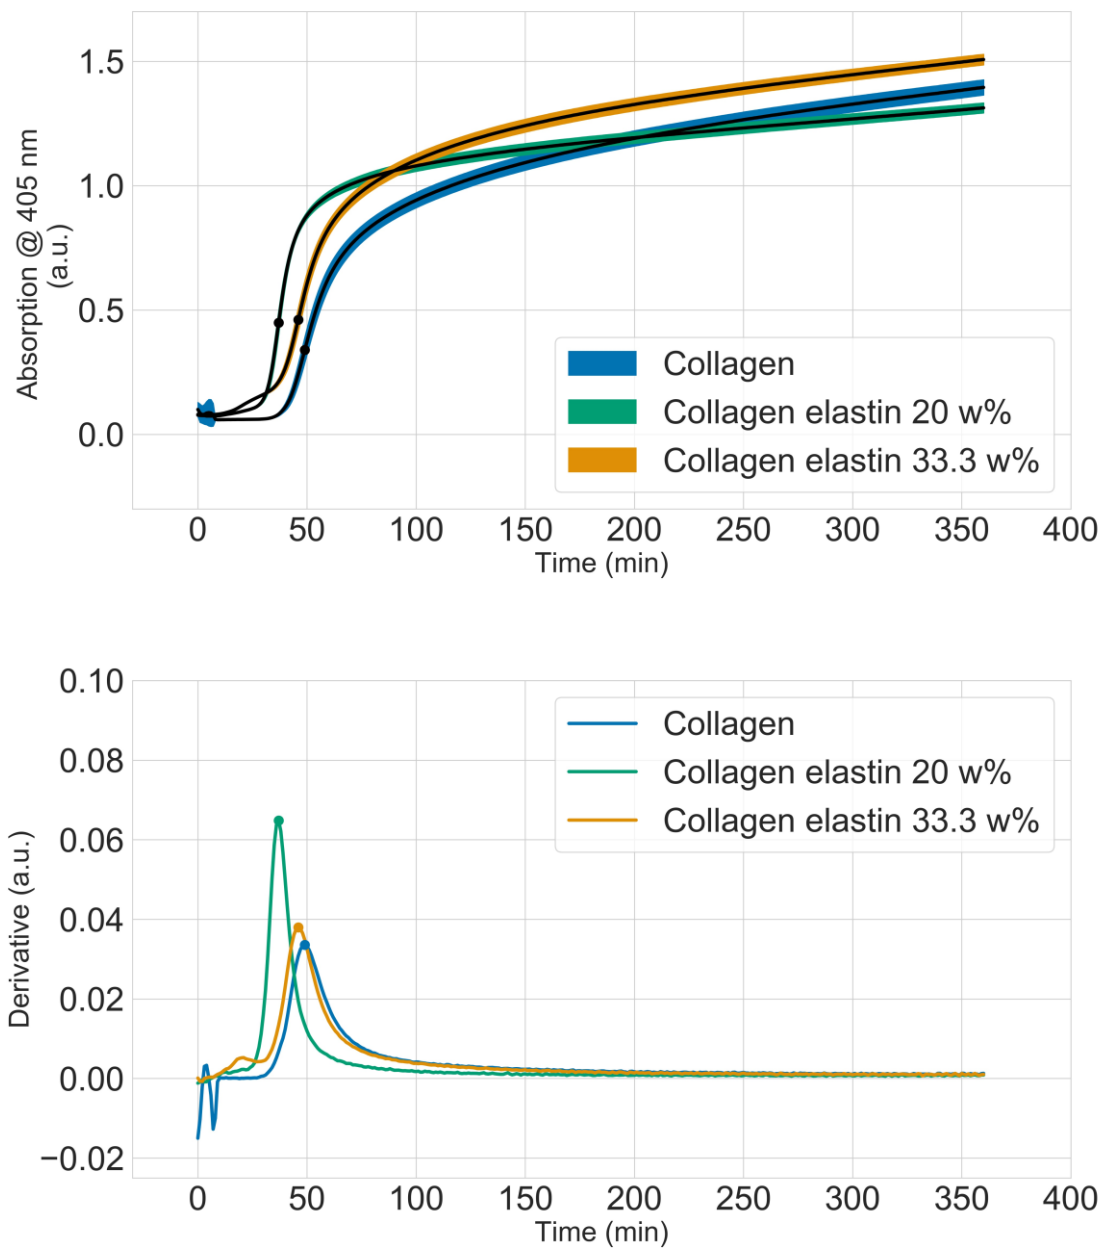

**Figure S3.** Top: Extended polymerization curves. Mean polymerization curves at 37 °C for a 2 mg/ml collagen solution as well as two collagen elastin solutions containing 20 w% (0.6 mg/ml elastin) and 33.3 w% (1.2 mg/ml elastin) respectively. Bottom: Derivative of the mean of the top curves. Six wells were recorded per sample and the color-coded curves in the top figure denote one standard deviation.

*Video S1* - Video of a 2 mg/ml collagen gel during polymerization.

*Video S2* - Video of a 2 mg/ml collagen + 0.5 mg/ml elastin gel during polymerization.

*Video S3* - Video of a 2 mg/ml collagen + 1.2 mg/ml elastin gel during polymerization.

*Video S4* - Comparison of the videos V1 – V3, where V1 is left, V2 is in the middle and V3 is right.

Video Link: <https://speicherwolke.uni-leipzig.de/index.php/s/yDa4fEkgS82eTFE>

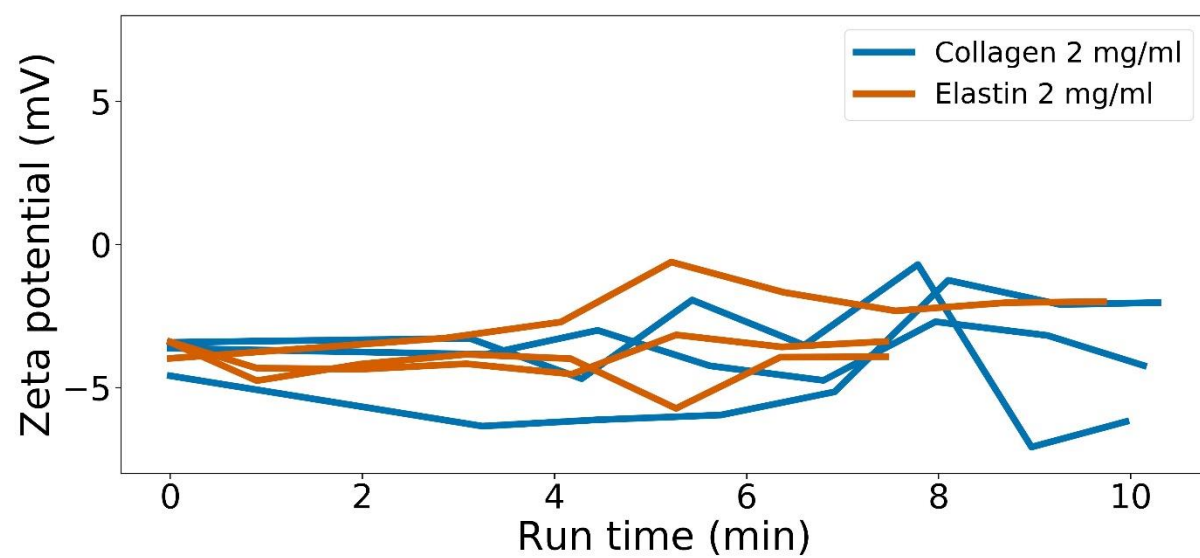

**Figure S4.** Measured zeta potential values over time. Three samples were analyzed per condition.
